# Supplementary material for: A hybrid aerogel of Co–Al layered double hydroxide/graphene with three-dimensional porous structure as a novel electrode material for supercapacitors
Source: Royal Society of Chemistry journal article supplement (doi:10.1039/c5ra00103j), 2015-01-01
Supplement: c5ra00103j1.pdf [file c5ra00103j1.pdf]

**Supplementary Information for**  
**“A Hybrid Aerogels of Co-Al Layered Double**  
**Hydroxides/Graphene with Three-dimensional Porous Structure**  
**as a Novel Electrode Material of Supercapacitors” by**

**Aili Zhang, Cong Wang, Qunjie Xu, Haimei Liu\*, Yonggang Wang\*, Yongyao  
Xia**

---

\* The authors to whom correspondence should be addressed,  
e-mail: [liuhm@shiep.edu.cn](mailto:liuhm@shiep.edu.cn) (H. Liu), [ygwang@fudan.edu.cn](mailto:ygwang@fudan.edu.cn) (Y. Wang)

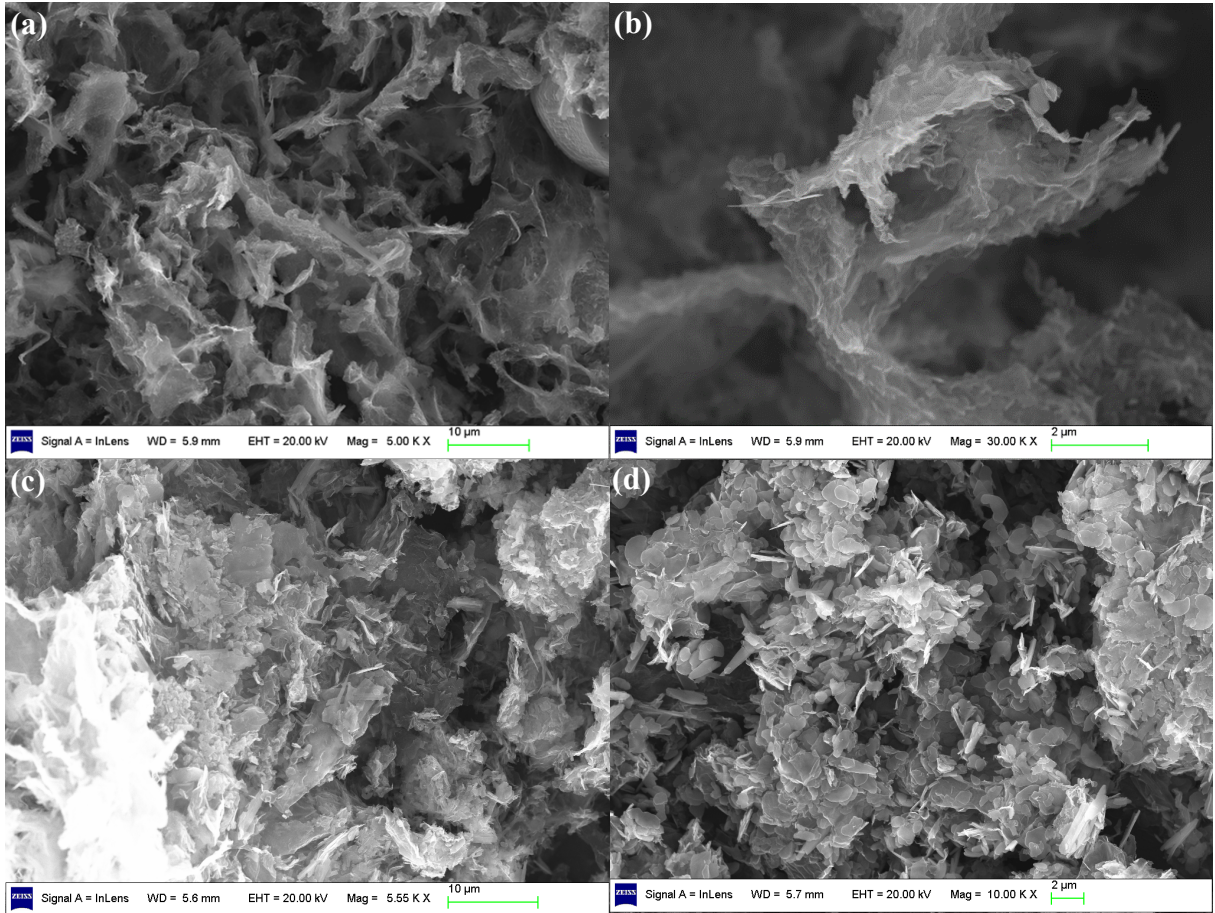

**Fig. S1** SEM images of (a) and (b) Co-Al LDHs/GHAs-15.2% and (c) and (d) Co-Al LDHs/GHAs-10.6%.

With the purpose of confirming the effects of GAs content on the morphologies of Co-Al LDHs/GHAs composites, SEM of Co-Al LDHs/GHAs-10.6%, and Co-Al LDHs/GHAs-15.2% are also inspected and the corresponding images are exhibited in Fig. S1. It can be clearly observed in Fig. S1 a and b that because of the high GA content in Co-Al LDHs/GHAs-15.2%, 3D structure has been well maintained but the existence of Co-Al LDHs in this composite is not enough. As shown in Fig. S1 c and d, for Co-Al LDHs/GHAs-10.6%, because of the lower content of GA and higher content of Co-Al LDHs, 3D structure cannot well maintained and obvious aggregation appeared obviously.

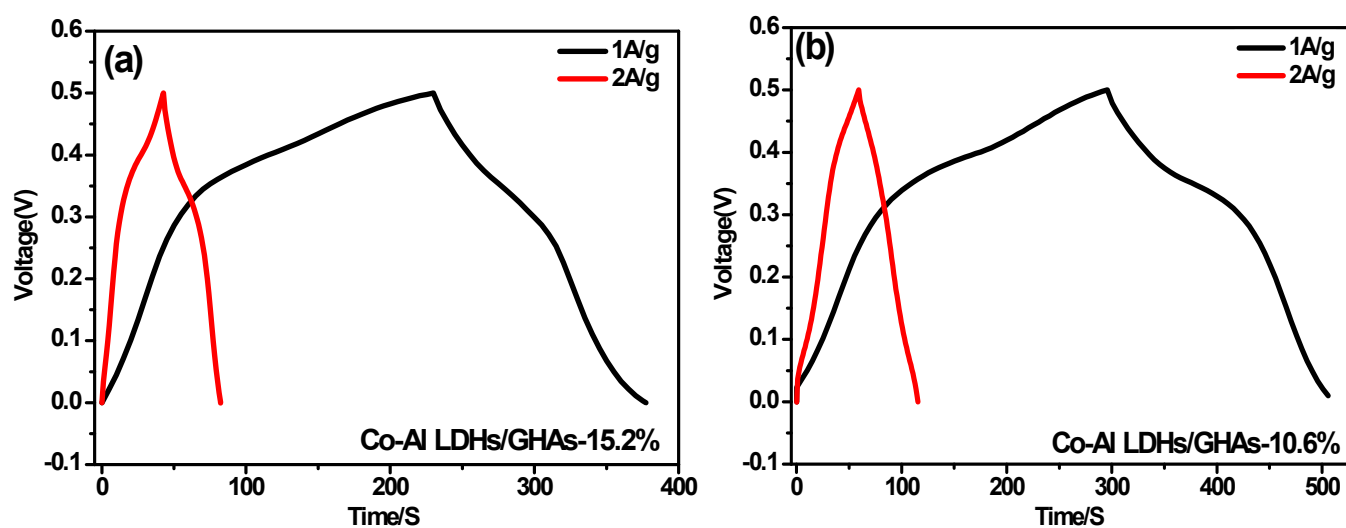

**Fig. S2** The charge-discharge curve of (a) Co-Al LDHs/GHAs-15.2% and (b) Co-Al LDHs/GHAs-10.6%.

In order to ensure the effects of GAs content on the electrochemical performance of Co-Al LDHs/GHAs composites, the charge-discharge curve of Co-Al LDHs/GHAs-15.2% and Co-Al LDHs/GHAs-10.6% at various current densities are also detected and exhibited in Fig. S2. It can be clearly observed in Fig. S2 that the specific capacitance of Co-Al LDHs/GHAs-15.2% and Co-Al LDHs/GHAs-10.6% at  $1 \text{ A g}^{-1}$  is  $294 \text{ F g}^{-1}$  and  $425 \text{ F g}^{-1}$ , respectively. At  $2 \text{ A g}^{-1}$ , their specific capacitance decay to  $160 \text{ F g}^{-1}$  and  $236 \text{ F g}^{-1}$ , respectively. When compared with the target 3D Co-Al LDHs/GHAs-13.7%, further increase or decrease of GAs loading both result in a decrease of specific capacitance. This can be attributed to many factors: when the loading content of GAs in Co-Al LDHs/GHAs too much (Co-Al LDHs/GHAs-15.2%), the pseudocapacitance, which produces from Co-Al LDHs, of the composite will obviously decrease; as a result, the Co-Al LDHs/GHAs shows a low specific capacitance. When the loading content of GAs in Co-Al LDHs/GHAs too little (Co-Al LDHs/GHAs-10.6%), it does not favor the formation of effectively dispersed Co-Al-LDH layers on GAs and the 3D structure becomes unobvious, which results in the low utilization of Co-Al-LDH. That is to say, if the loading content of GAs in Co-Al LDHs/GHAs is suitable, the structural advantage of the composite can be reflected apparently, as a result, the electrochemical properties of the composite will obviously be improved.

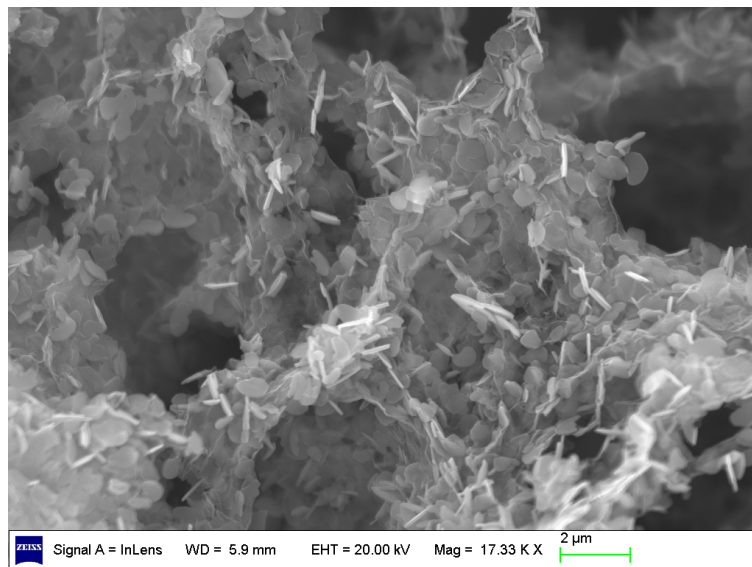

**Fig. S3.** Large-multiple SEM images of 3D Co-Al LDH/GHAs in some selected regions.

In order to further confirm the composite state of Co-Al LDH and graphene areogels in 3D Co-Al LDH/GHAs compounds, large-multiple SEM image of 3D Co-Al LDH/GHAs in some selected regions has been supplemented in Fig. S3, the close observation of the composite is shown in Fig. S3 and shows that Co-Al LDHs are uniformly dispersed on every area of graphene areogels nanosheets, indicating efficient assembly between Co-Al LDHs and graphene layers.
